# Supplementary material for: Point‐of‐care hepatitis C testing and treatment strategy for people attending harm reduction and addiction centres for hepatitis C elimination
Source: PubMed Central journal article supplement (PMC9299793; doi:10.1111/jvh.13634), 2021-11-29

**(a) "Test and Treat" in Point-of-care (HRC)**

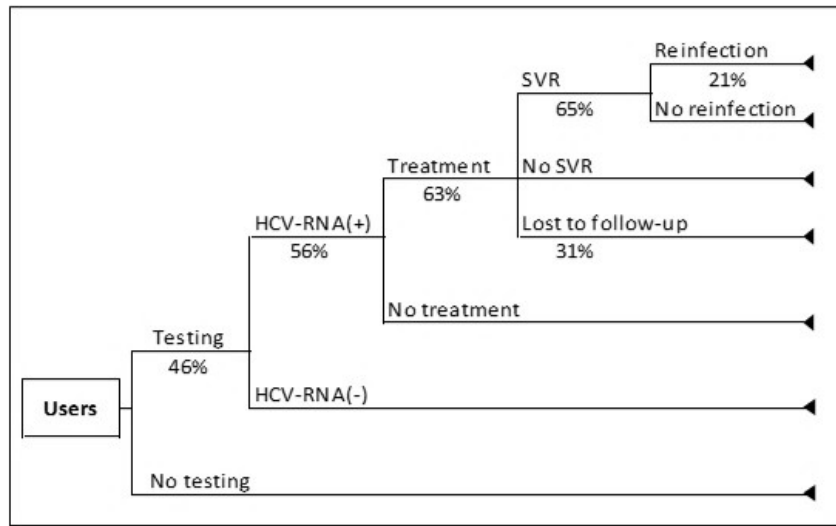

**(b) Standard-of-care (HRC)**

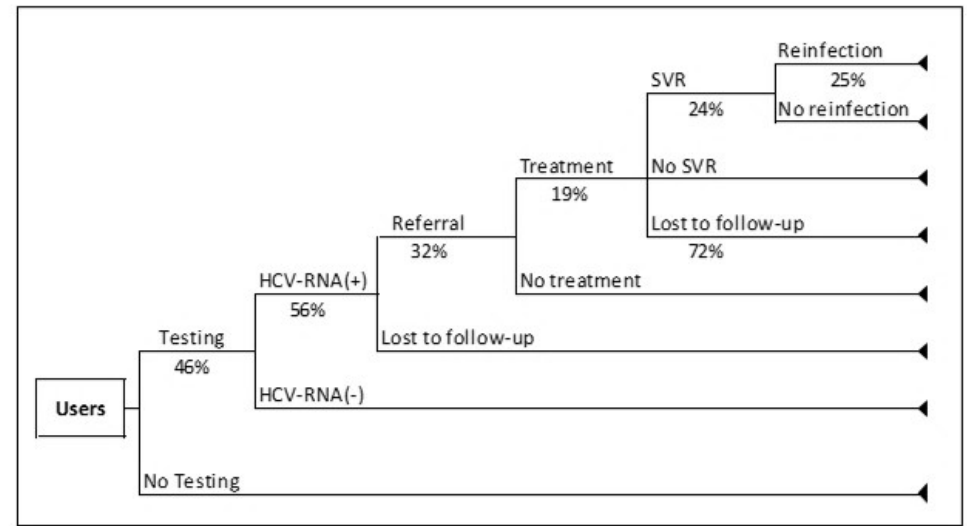

**(c) "Test and Treat" in Point-of-care (AC)**

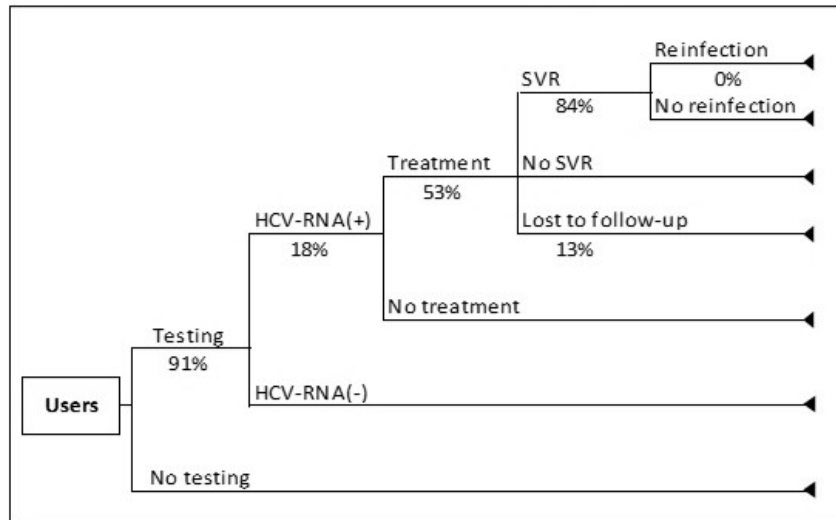

**(d) Standard-of-care (AC)**

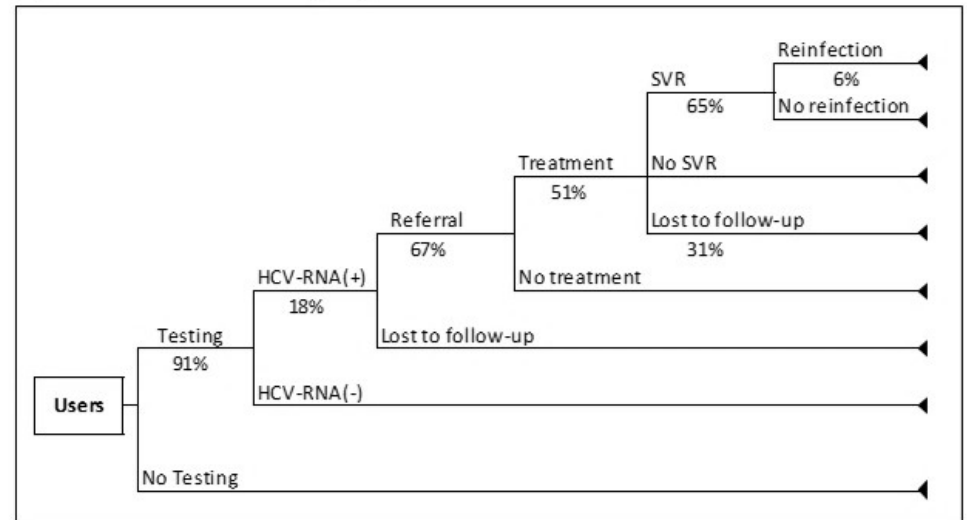

Supplement: JVH-29-227-s001.pdf [file JVH-29-227-s001.pdf]
